# Supplementary material for: A Novel Strategy for Identifying NSCLC MicroRNA Biomarkers and Their Mechanism Analysis Based on a Brand-New CeRNA-Hub-FFL Network
Source: MDPI journal article supplement (doi:10.3390/ijms231911303), 2022-09-25
Supplement: s1 [file s1]

Supplementary Figures and Tables

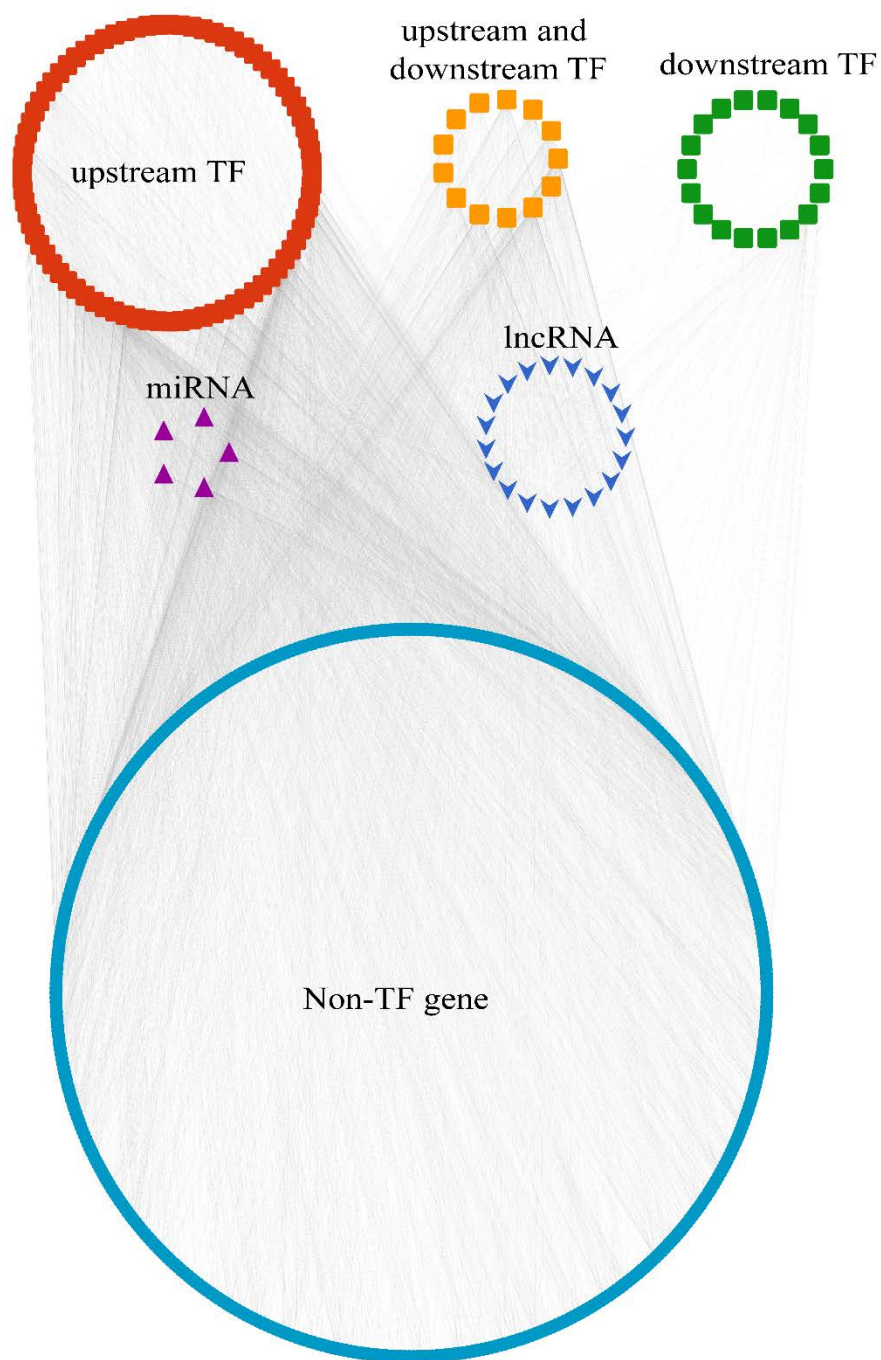

**Figure S1.** FFL constructed based on miRNA markers.

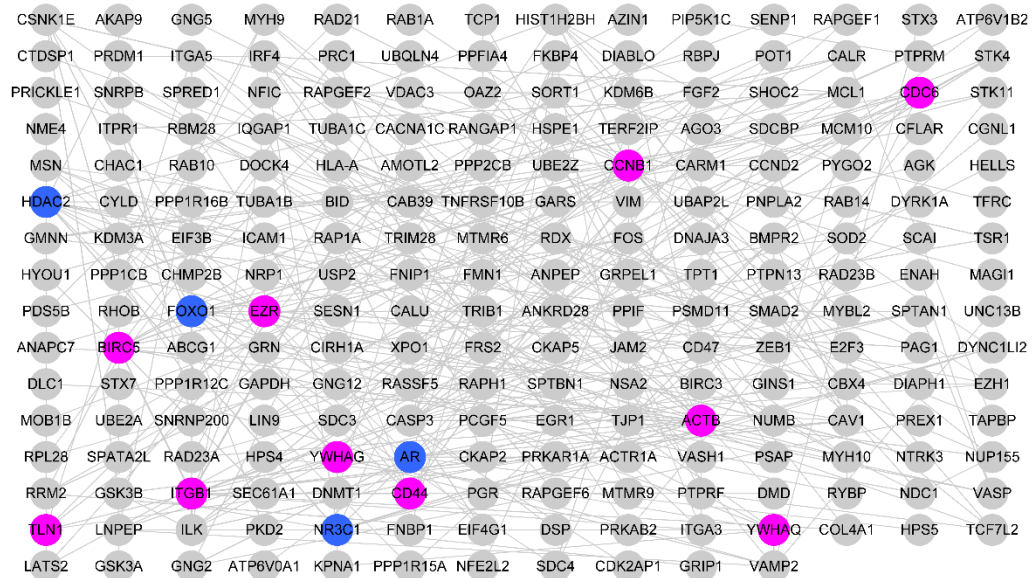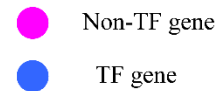

**Figure S2.** PPI network of miRNA target genes.

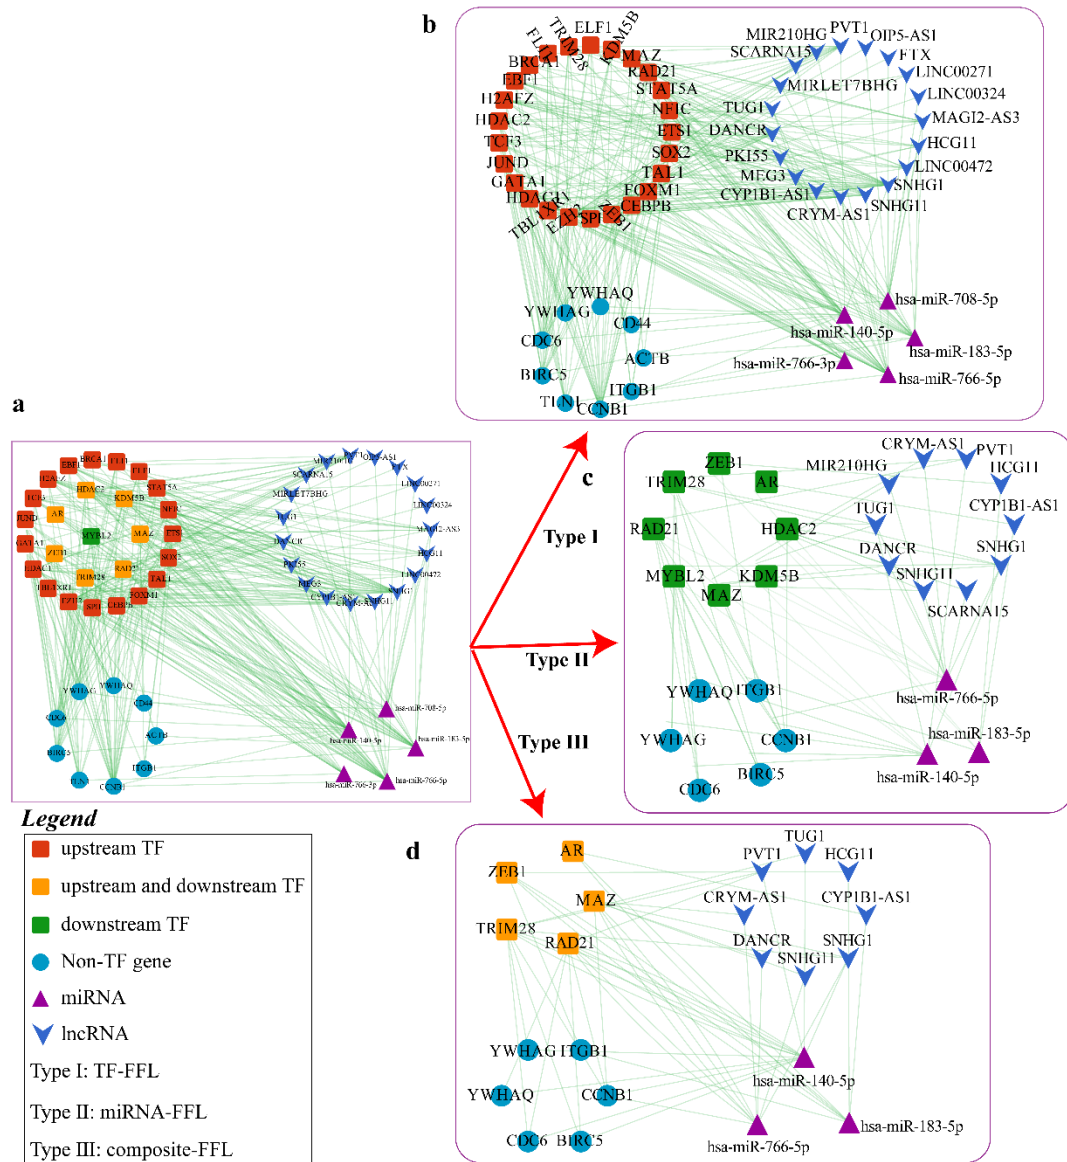

**Figure S3.** Hub-FFL. Fig. S3a is the total network; it can be divided into three different types of hub-FFL networks. (b) Type I subnetwork. (c) Type II subnetwork. (d) Type III subnetwork.

**Table S1.** MiRNAs with significantly high independent regulatory capacity in LUAD.

| miRNA             | NOG value | p-value of<br>NOG | TFP value | p-value of TFP |
|-------------------|-----------|-------------------|-----------|----------------|
| <b>miR-218-5p</b> | 12        | 1.37E-36          | 0.1638    | 0.029499       |
| <b>miR-26a-5p</b> | 11        | 2.24E-35          | 0.1656    | 0.020696       |
| <b>miR-101-3p</b> | 8         | 2.24E-27          | 0.177     | 2.55E-04       |
| <b>miR-32-5p</b>  | 7         | 9.22E-24          | 0.2639    | 3.55E-15       |
| <b>miR-296-5p</b> | 7         | 9.22E-24          | 0.25      | 1.78E-14       |
| <b>miR-96-5p</b>  | 6         | 1.31E-18          | 0.1692    | 0.006276       |
| <b>miR-224-5p</b> | 6         | 1.31E-18          | 0.1774    | 1.97E-04       |
| <b>miR-708-5p</b> | 6         | 1.31E-18          | 0.1628    | 0.045212       |
| <b>miR-129-5p</b> | 5         | 4.29E-13          | 0.2727    | 1.78E-15       |
| <b>miR-150-5p</b> | 5         | 4.29E-13          | 0.1667    | 0.014513       |
| miR-30c-5p        | 4         | 2.88E-07          | 0.1799    | 5.68E-05       |
| miR-181c-5p       | 4         | 2.88E-07          | 0.194     | 2.38E-07       |
| miR-2115-5p       | 4         | 2.88E-07          | 0.2222    | 2.53E-12       |
| miR-618           | 3         | 0.023184          | 0.1905    | 7.84E-07       |
| miR-1908-5p       | 3         | 0.023184          | 0.2105    | 7.82E-10       |
| miR-190a-5p       | 3         | 0.023184          | 0.1923    | 4.36E-07       |
| miR-1260a         | 3         | 0.023184          | 0.25      | 1.78E-14       |
| miR-192-5p        | 3         | 0.023184          | 0.1875    | 3.78E-06       |
| miR-216b-5p       | 3         | 0.023184          | 0.1765    | 3.14E-04       |
| miR-146b-5p       | 3         | 0.023184          | 0.1852    | 1.04E-05       |

**Note:** default threshold: p-value <0.05, Wilcoxon signed-rank test, NOG values of miRNAs bigger than the median are marked as bolded.

**Table S2.** MiRNAs with significantly high independent regulatory capacity in LUSC.

| miRNA ID          | NOG value | p-value of NOG | TFP value | p-value of TFP |
|-------------------|-----------|----------------|-----------|----------------|
| <b>miR-766-3p</b> | 16        | 1.60E-31       | 0.1587    | 0.015976       |

|                    |    |          |        |          |
|--------------------|----|----------|--------|----------|
| <b>miR-101-3p</b>  | 12 | 3.30E-27 | 0.1572 | 0.019063 |
| Continued Table S2 |    |          |        |          |
| <b>miR-296-5p</b>  | 10 | 1.05E-21 | 0.2281 | 1.39E-11 |
| <b>miR-766-5p</b>  | 10 | 1.05E-21 | 0.1667 | 0.002393 |
| <b>miR-744-5p</b>  | 8  | 7.11E-15 | 0.2133 | 1.06E-09 |
| <b>miR-96-5p</b>   | 8  | 7.11E-15 | 0.1641 | 0.003513 |
| <b>miR-1908-5p</b> | 7  | 5.16E-11 | 0.2667 | 1.14E-13 |
| <b>miR-140-5p</b>  | 7  | 5.16E-11 | 0.2195 | 1.25E-10 |
| <b>miR-183-5p</b>  | 7  | 5.16E-11 | 0.16   | 0.010558 |
| miR-532-3p         | 6  | 4.34E-07 | 0.2121 | 1.37E-09 |
| miR-491-5p         | 6  | 4.34E-07 | 0.2927 | 5.68E-14 |
| miR-320e           | 6  | 4.34E-07 | 0.2286 | 9.21E-12 |
| miR-224-5p         | 6  | 4.34E-07 | 0.1782 | 3.58E-05 |
| miR-219a-5p        | 6  | 4.34E-07 | 0.1667 | 0.002393 |
| miR-346            | 5  | 3.05E-04 | 0.1842 | 6.86E-06 |
| miR-19b-1-5p       | 5  | 3.05E-04 | 0.1781 | 3.78E-05 |

**Note:** default threshold: p-value <0.05, Wilcoxon signed-rank test, NOG values of miRNAs bigger than the median are marked as bolded.

**Table S3.** LUAD-related important genes.

| Gene symbol | Gene ID | Gene symbol | Gene ID |
|-------------|---------|-------------|---------|
| ADAMTS8     | 11095   | CBX8        | 57332   |
| AKIRIN2     | 55122   | CCDC6       | 8030    |
| ANXA1       | 301     | CDKN1A      | 1026    |
| AQP1        | 358     | CDON        | 50937   |
| BAIAP2L1    | 55971   | CEACAM6     | 4680    |
| CADM1       | 23705   | CRK         | 1398    |
| CAV1        | 857     | CSF3        | 1440    |
| CBFA2T3     | 863     | CSNK1A1     | 1452    |
| CXCL3       | 2921    | MAL         | 4118    |
| CXXC5       | 51523   | MINA        | 84864   |
| DCUN1D3     | 123879  | MUC4        | 4585    |
| DLC1        | 10395   | MXI1        | 4601    |
| DLX5        | 1749    | NKX3-1      | 4824    |

|                    |        |         |        |
|--------------------|--------|---------|--------|
| DNAJA3             | 9093   | NME1    | 4830   |
| Continued Table S3 |        |         |        |
| DNAJB1             | 3337   | NPAS2   | 4862   |
| DUSP26             | 78986  | NPM1    | 4869   |
| DUSP9              | 1852   | PAEP    | 5047   |
| E2F5               | 1875   | PAX6    | 5080   |
| EDNRB              | 1910   | PDGFB   | 5155   |
| EEF1A2             | 1917   | PDGFRL  | 5157   |
| EMP1               | 2012   | PDLIM4  | 8572   |
| EMP2               | 2013   | PEBP1   | 5037   |
| ERBB2              | 2064   | PELP1   | 27043  |
| ETS1               | 2113   | PIK3R1  | 5295   |
| FADD               | 8772   | PLAGL1  | 5325   |
| FGF10              | 2255   | PSIP1   | 11168  |
| FGFR1              | 2260   | PTTG1IP | 754    |
| FHL1               | 2273   | RASAL1  | 8437   |
| FLCN               | 201163 | RASSF1  | 11186  |
| FOXA1              | 3169   | RASSF8  | 11228  |
| FOXP1              | 27086  | SFN     | 2810   |
| FOXQ1              | 94234  | SFRP1   | 6422   |
| FYN                | 2534   | SGMS1   | 259230 |
| FZD2               | 2535   | SIK1    | 150094 |
| GADD45B            | 4616   | SLC39A4 | 55630  |
| GPR110             | 266977 | SLIT2   | 9353   |
| GPR132             | 29933  | SMARCA4 | 6597   |
| GPX3               | 2878   | SOX11   | 6664   |
| HDAC1              | 3065   | SOX7    | 83595  |
| HIC1               | 3090   | SPARCL1 | 8404   |
| HSPA1A             | 3303   | SRC     | 6714   |
| HTATIP2            | 10553  | TBX5    | 6910   |
| ID1                | 3397   | THBD    | 7056   |
| ID2                | 3398   | TP53    | 7157   |
| IDH1               | 3417   | TRIM35  | 23087  |
| ING3               | 54556  | TRIT1   | 54802  |
| JUP                | 3728   | TSLP    | 85480  |
| KLF4               | 9314   | TWIST2  | 117581 |
| KLF6               | 1316   | WNK2    | 65268  |
| LAPTM4B            | 55353  | ZBTB7A  | 51341  |

**Table S4.** LUSC-related important genes.

| Gene symbol | Gene ID | Gene symbol | Gene ID |
|-------------|---------|-------------|---------|
| ADAMTS8     | 11095   | DLX5        | 1749    |

| AKAP13     | 11214  | DMBT1   | 1755<br>Continued Table S4 |
|------------|--------|---------|----------------------------|
| AKAP9      | 10142  | DNAJA3  | 9093                       |
| AQP1       | 358    | DNMT3A  | 1788                       |
| ARL6IP5    | 10550  | DUSP22  | 56940                      |
| BAIAP2L1   | 55971  | DUSP26  | 78986                      |
| BATF2      | 116071 | DUSP9   | 1852                       |
| BCL2L1     | 598    | ECT2    | 1894                       |
| BCL3       | 602    | EDNRB   | 1910                       |
| BHLHE41    | 79365  | EED     | 8726                       |
| BIRC5      | 332    | EEF1A2  | 1917                       |
| CABLES1    | 91768  | EI24    | 9538                       |
| CADM1      | 23705  | EIF3I   | 8668                       |
| CAV1       | 857    | EMP1    | 2012                       |
| CBFA2T3    | 863    | EMP2    | 2013                       |
| CBX8       | 57332  | EPB41L3 | 23136                      |
| CCDC28A    | 25901  | EPHA3   | 2042                       |
| CCNB1      | 891    | ETS1    | 2113                       |
| CCNDBP1    | 23582  | FADD    | 8772                       |
| CDK2       | 1017   | FAM83D  | 81610                      |
| CDKN1A     | 1026   | FBP1    | 2203                       |
| CDON       | 50937  | FGF10   | 2255                       |
| CEACAM6    | 4680   | FGFR1   | 2260                       |
| CMTM3      | 123920 | FHL1    | 2273                       |
| CRK        | 1398   | FLCN    | 201163                     |
| CRLF2      | 64109  | FOS     | 2353                       |
| CSF3       | 1440   | FOXA1   | 3169                       |
| CSNK2A1    | 1457   | FOXA2   | 3170                       |
| CTDSPL     | 10217  | FOXO1   | 2305                       |
| CXCL3      | 2921   | FOXP1   | 27086                      |
| CXCR4      | 7852   | FRAT1   | 10023                      |
| DCN        | 1634   | FUS     | 2521                       |
| DCUN1D1    | 54165  | FYN     | 2534                       |
| DCUN1D3    | 123879 | G0S2    | 50486                      |
| DIABLO     | 56616  | GADD45B | 4616                       |
| DLC1       | 10395  | GADD45G | 10912                      |
| GADD45GIP1 | 90480  | MRAS    | 22808                      |
| GFI1       | 2672   | MRE11A  | 4361                       |
| GLTSCR2    | 29997  | MTUS1   | 57509                      |
| GMNN       | 51053  | MUC1    | 4582                       |
| GNAI2      | 2771   | MXI1    | 4601                       |
| GPR110     | 266977 | NCOA3   | 8202                       |
| GPRC5A     | 9052   | NEDD4L  | 23327                      |
| GPX3       | 2878   | NEDD9   | 4739                       |

| GSK3A              | 2931   | NINJ1    | 4814  |
|--------------------|--------|----------|-------|
| Continued Table S4 |        |          |       |
| H2AFX              | 3014   | NKX2-1   | 7080  |
| HDAC1              | 3065   | NME1     | 4830  |
| HIC1               | 3090   | NRBP1    | 29959 |
| HLTF               | 6596   | NUP98    | 4928  |
| HOMER2             | 9455   | OLR1     | 4973  |
| HRAS               | 3265   | PA2G4    | 5036  |
| HSP90B1            | 7184   | PAEP     | 5047  |
| HSPA1A             | 3303   | PARP1    | 142   |
| HSPD1              | 3329   | PAX6     | 5080  |
| HTATIP2            | 10553  | PDCD5    | 9141  |
| ID1                | 3397   | PDGFB    | 5155  |
| ID2                | 3398   | PDLIM4   | 8572  |
| IDH1               | 3417   | PELP1    | 27043 |
| IGF1R              | 3480   | PHB      | 5245  |
| IGFALS             | 3483   | PIK3CA   | 5290  |
| IL24               | 11009  | PIK3R1   | 5295  |
| ING3               | 54556  | PLAGL1   | 5325  |
| IRF8               | 3394   | PLK1     | 5347  |
| IRX1               | 79192  | PRKCA    | 5578  |
| JAK1               | 3716   | PSMD10   | 5716  |
| JUP                | 3728   | PTCH1    | 5727  |
| KIF14              | 9928   | PTEN     | 5728  |
| KIF7               | 374654 | PTP4A1   | 7803  |
| KLF2               | 10365  | PTP4A3   | 11156 |
| KLF4               | 9314   | PTPRC    | 5788  |
| KLF6               | 1316   | RARRES3  | 5920  |
| KRAS               | 3845   | RASAL1   | 8437  |
| LAPTM4B            | 55353  | RASSF1   | 11186 |
| LMO4               | 8543   | RASSF8   | 11228 |
| LRP1B              | 53353  | RBM14    | 10432 |
| MAL                | 4118   | RBM3     | 5935  |
| MAT2A              | 4144   | RPA1     | 6117  |
| MINA               | 84864  | RPRM     | 56475 |
| MLLT11             | 10962  | SATB1    | 6304  |
| SGMS1              | 259230 | TP53     | 7157  |
| SLC39A4            | 55630  | TP53INP1 | 94241 |
| SLC3A2             | 6520   | TPD52    | 7163  |
| SLIT2              | 9353   | TRIM13   | 10206 |
| SMARCA4            | 6597   | TRIM35   | 23087 |
| SMO                | 6608   | TRIT1    | 54802 |
| SOCS1              | 8651   | TSC22D1  | 8848  |
| SOD2               | 6648   | TSLP     | 85480 |



|                    |       |         |        |
|--------------------|-------|---------|--------|
| SOX11              | 6664  | TSPAN32 | 10077  |
| Continued Table S4 |       |         |        |
| SOX2               | 6657  | TWIST1  | 7291   |
| SOX7               | 83595 | TWIST2  | 117581 |
| SPAG9              | 9043  | TYMS    | 7298   |
| SPARCL1            | 8404  | UCHL1   | 7345   |
| SRC                | 6714  | VEGFA   | 7422   |
| STAT5A             | 6776  | WISP1   | 8840   |
| STMN1              | 3925  | WNK2    | 65268  |
| TALDO1             | 6888  | WNT2    | 7472   |
| TBX5               | 6910  | YAP1    | 10413  |
| TFG                | 10342 | YBX1    | 4904   |
| THBD               | 7056  | ZFHX3   | 463    |

**Table S5.** The miRNAs corresponding to LUAD-related important genes.

| miRNA ID    | LUAD-related important genes |
|-------------|------------------------------|
| miR-101-3p  | KLF6, EMP1                   |
| miR-125a-5p | SLIT2, DLC1                  |
| miR-1293    | NME1                         |
| miR-142-5p  | RASSF8                       |
| miR-183-5p  | CAV1, SLIT2                  |
| miR-21-5p   | SLIT2                        |
| miR-3065-5p | DLC1                         |
| miR-484     | CAV1                         |
| miR-548l    | CAV1                         |
| miR-708-5p  | SLIT2                        |
| miR-93-5p   | CAV1                         |
| miR-942-5p  | SLIT2                        |
| miR-126-5p  | DLC1                         |

**Table S6.** The miRNAs corresponding to LUSC-related important genes.

| miRNA ID    | LUSC-related important genes    |
|-------------|---------------------------------|
| let-7a-5p   | GMNN, H2AFX, FOXM1              |
| let-7b-5p   | WNK2, GMNN, H2AFX, FOXM1, CCNB1 |
| let-7c-5p   | GMNN, H2AFX                     |
| miR-100-5p  | SMO, PLK1                       |
| miR-101-3p  | KLF2, FHL1                      |
| miR-101-5p  | STMN1                           |
| miR-103a-3p | AKAP13                          |
| miR-107     | AKAP13, GPRC5A, DMBT1, CAV1     |

| miR-1246     | KLF6                                          | Continued Table S6 |
|--------------|-----------------------------------------------|--------------------|
| miR-125a-5p  | DLC1, SLIT2                                   |                    |
| miR-126-5p   | DLC1                                          |                    |
| miR-127-5p   | STMN1                                         |                    |
| miR-1287-5p  | GMNN                                          |                    |
| miR-1295a    | DUSP9                                         |                    |
| miR-134-5p   | FOXM1                                         |                    |
| miR-140-5p   | CCNB1, BIRC5                                  |                    |
| miR-145-5p   | SOX2                                          |                    |
| miR-153-3p   | ECT2                                          |                    |
| miR-15b-5p   | KIF14, JUP, BIRC5                             |                    |
| miR-181a-5p  | CCNB1, BIRC5                                  |                    |
| miR-181b-5p  | FAM83D                                        |                    |
| miR-181c-5p  | CADM1, IRF8, ETS1                             |                    |
| miR-183-5p   | FOS, KLF6, CAV1                               |                    |
| miR-185-5p   | DUSP9                                         |                    |
| miR-224-5p   | STMN1, ECT2                                   |                    |
| miR-2355-5p  | NEDD9                                         |                    |
| miR-26a-5p   | FAM83D, TYMS, STMN1, HSPD1, CCNB1             |                    |
| miR-29a-5p   | CCNB1                                         |                    |
| miR-30a-5p   | DCUN1D1                                       |                    |
| miR-30c-5p   | DCUN1D1, CCNB1                                |                    |
| miR-30d-5p   | DCUN1D1, GMNN                                 |                    |
| miR-31-5p    | FAM83D, STMN1                                 |                    |
| miR-320e     | WNT2                                          |                    |
| miR-32-5p    | KLF2                                          |                    |
| miR-331-3p   | JUP                                           |                    |
| miR-34a-5p   | WNK2, PLK1, STMN1, FOXM1, BIRC5, SOX2         |                    |
| miR-361-5p   | AKAP13, CEACAM6                               |                    |
| miR-425-5p   | STMN1, CCNB1                                  |                    |
| miR-429      | DLC1, ETS1                                    |                    |
| miR-485-5p   | DLC1                                          |                    |
| miR-548l     | BIRC5                                         |                    |
| miR-589-5p   | FOXM1, CCNB1                                  |                    |
| miR-590-5p   | OLR1                                          |                    |
| miR-642a-5p  | NME1                                          |                    |
| miR-671-5p   | DLC1, SLIT2                                   |                    |
| miR-7-5p     | FAM83D, GMNN, TYMS, PLK1, H2AFX, CCNB1, BIRC5 |                    |
| miR-766-3p   | DLC1                                          |                    |
| miR-766-5p   | CCNB1                                         |                    |
| miR-873-5p   | CAV1                                          |                    |
| miR-92a-1-5p | KLF2, GPRC5A, CAV1                            |                    |
| miR-944      | KLF2                                          |                    |

**Table S7.** Regulatory pairs based on miRNA markers.

| Regulation Pairs | LUAD | LUSC  |
|------------------|------|-------|
| miRNA-gene       | 80   | 477   |
| miRNA-TF         | 13   | 73    |
| miRNA-lncRNA     | 26   | 118   |
| TF-gene          | 7276 | 41003 |
| TF-miRNA         | 318  | 641   |
| TF-lncRNA        | 14   | 162   |

**Table S8.** Summary of 4-node FFLs based on miRNA markers.

|              | I    | II  | III | Total |
|--------------|------|-----|-----|-------|
| No.          | 4662 | 681 | 318 | 566   |
| TFs          | 94   | 32  | 8   | 112   |
| miRNAs       | 5    | 5   | 5   | 5     |
| genes        | 484  | 276 | 210 | 486   |
| lncRNAs      | 19   | 13  | 10  | 19    |
| miRNA-gene   | 515  | 287 | 217 | 517   |
| miRNA-TF     | -    | 32  | 9   | 32    |
| miRNA-lncRNA | 24   | 15  | 11  | 24    |
| TF-miRNA     | 153  | -   | 9   | 153   |
| TF-gene      | 4404 | 648 | 300 | 4739  |
| TF-lncRNA    | 141  | 27  | 12  | 153   |
